# Supplementary material for: Speciation of mercury in coal using HPLC-CV-AFS system: Comparison of different extraction methods
Source: Royal Society of Chemistry journal article supplement (doi:10.1039/b801613e), 2008-01-01
Supplement: b801613e.pdf [file b801613e.pdf]

1 **Electronic supplementary information**

2

3 Speciation of Mercury in Coal Using HPLC-CV-AFS System:

4 Comparison of Different Extraction Methods

5

6 **Erle Gao, Guibin Jiang\*, Bin He, Yongguang Yin and Jianbo Shi**

7

8 State Key Laboratory of Environmental Chemistry and Ecotoxicology,

9 Research Center for Eco-Environmental Sciences, Chinese Academy of

10 Sciences, P.O. Box 2871, 100085 Beijing, People's Republic of China

11 E-mail: [gbiang@rcees.ac.cn](mailto:gbiang@rcees.ac.cn) Fax: +86-10-62849179

12

1 **Tables**

2

3 **Table S1** Recoveries of microwave assisted extraction at 30w-120w powers using  
4 TMA and KOH/CH<sub>3</sub>OH as extractants

5

| Power | Extractants            | Recoveries (MeHg, %) | Recoveries (EtHg, %) |
|-------|------------------------|----------------------|----------------------|
| 30 w  | TMA                    | 73.8 ± 1.7           | 70.7 ± 2.2           |
|       | KOH/CH <sub>3</sub> OH | 72.2 ± 6.3           | 70.1 ± 2.4           |
| 60 w  | TMA                    | 90.3 ± 4.0           | 75.6 ± 5.4           |
|       | KOH/CH <sub>3</sub> OH | 88.3 ± 4.2           | 75.5 ± 10.7          |
| 90 w  | TMA                    | 90.3 ± 3.7           | 77.6 ± 5.5           |
|       | KOH/CH <sub>3</sub> OH | 85.8 ± 0.4           | 77.9 ± 6.5           |
| 120 w | TMA                    | 75.3 ± 1.3           | 70.7 ± 3.6           |
|       | KOH/CH <sub>3</sub> OH | 72.5 ± 2.6           | 71.0 ± 6.6           |

6

1 **Figures**

2

3 **Figure S1** Chromatogram of the standard solution for MeHg and EtHg, 5 ng ml<sup>-1</sup>.

4

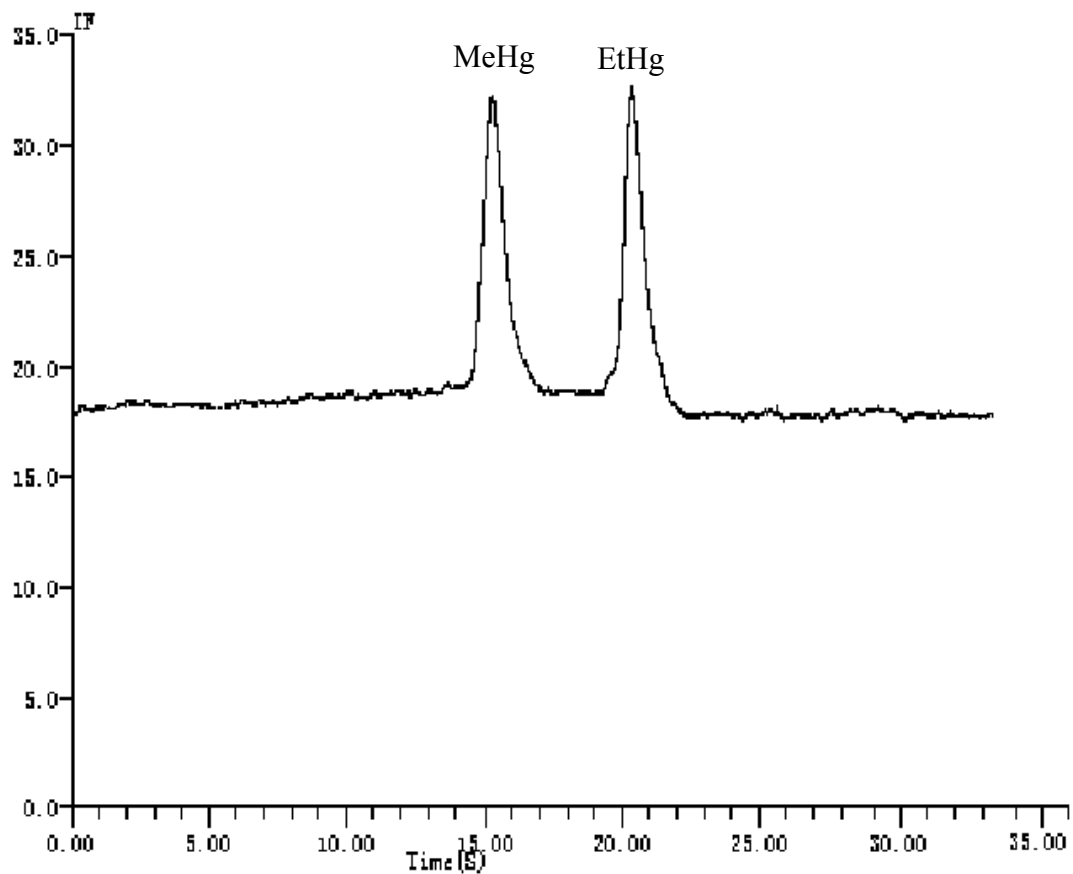

5

6

7

8

9

10

11

12

13

14

15

1 **Figure S2** Effect of  $K_2S_2O_8$  and  $KBH_4$  concentrations on fluorescence intensity of

2 MeHg and EtHg.

3

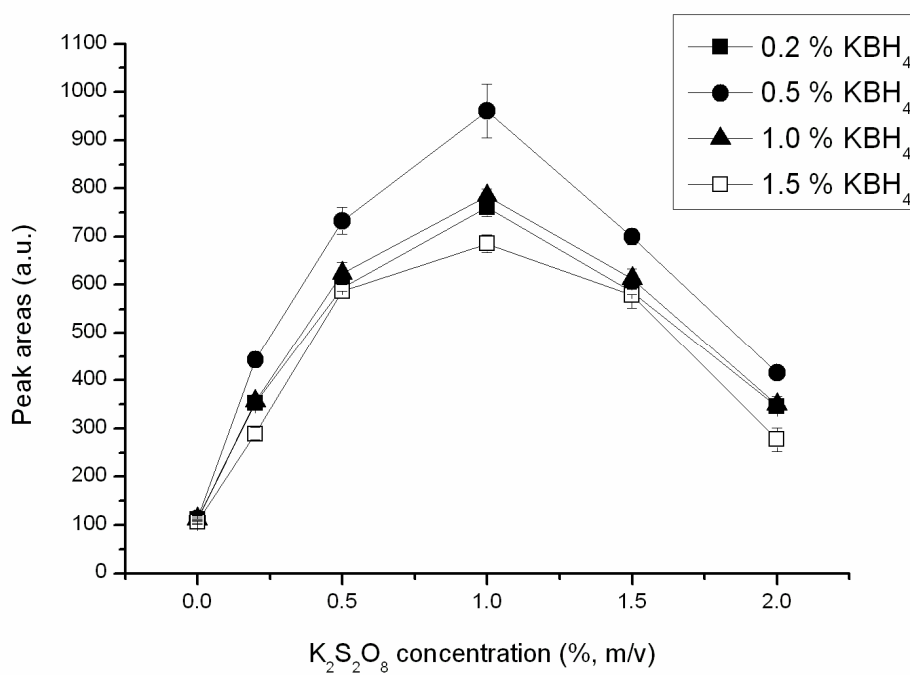

4

5

1 **Figure S3** Effect of argon gas on fluorescence intensity of MeHg and EtHg.

2

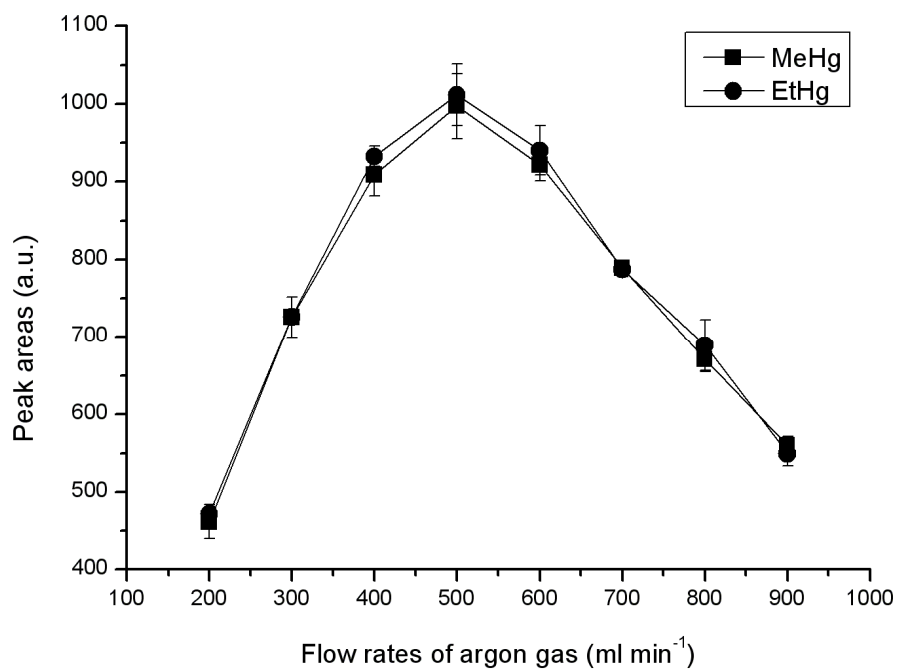

3

4

1 **Figure S4** Recoveries of the shaking extraction for MeHg and EtHg using different

2 extraction solvents. 1 TMA; 2 KOH/CH<sub>3</sub>OH; 3 HCl; 4 KBr/CuSO<sub>4</sub>.

3

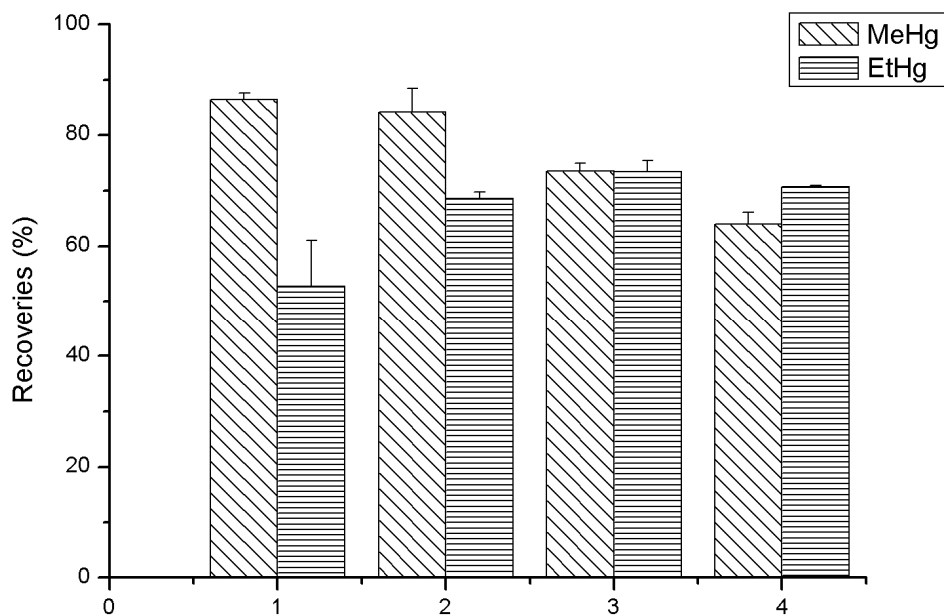

4

5

1 **Figure S5** Recoveries of the ultrasonic extraction for MeHg and EtHg using  
2 different extraction solvents. 1 TMA; 2 KOH/CH<sub>3</sub>OH; 3 HCl; 4  
3 KBr/CuSO<sub>4</sub>.

4

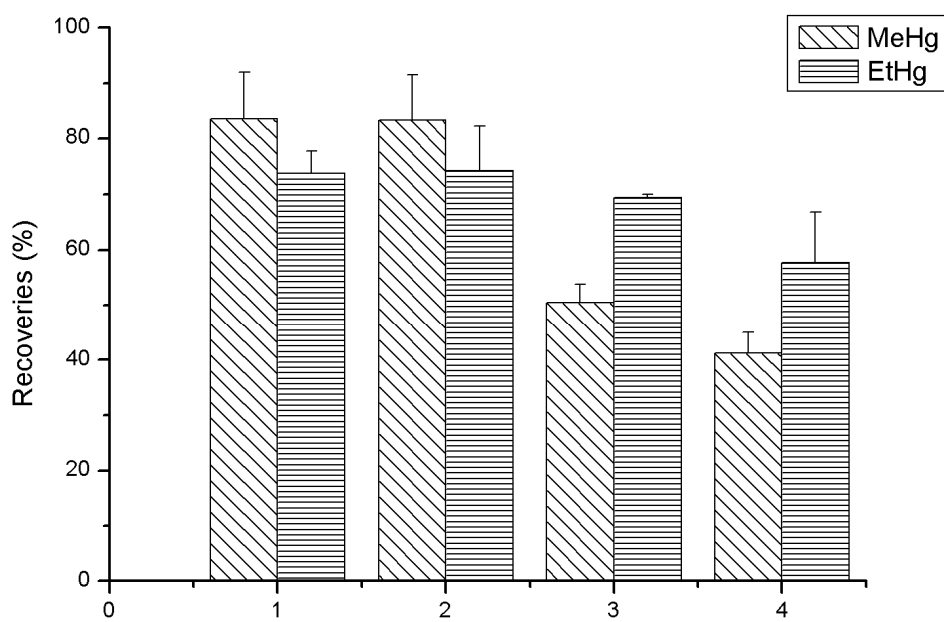

5

6

1 **Figure S6** Recoveries of the microwave assisted extraction at different powers for  
2 MeHg and EtHg using different extraction solvents. (a) 30w; (b) 60w; (c)  
3 90w; (d) 120w. 1 TMA; 2 KOH/CH<sub>3</sub>OH; 3 HCl; 4 KBr/CuSO<sub>4</sub>.

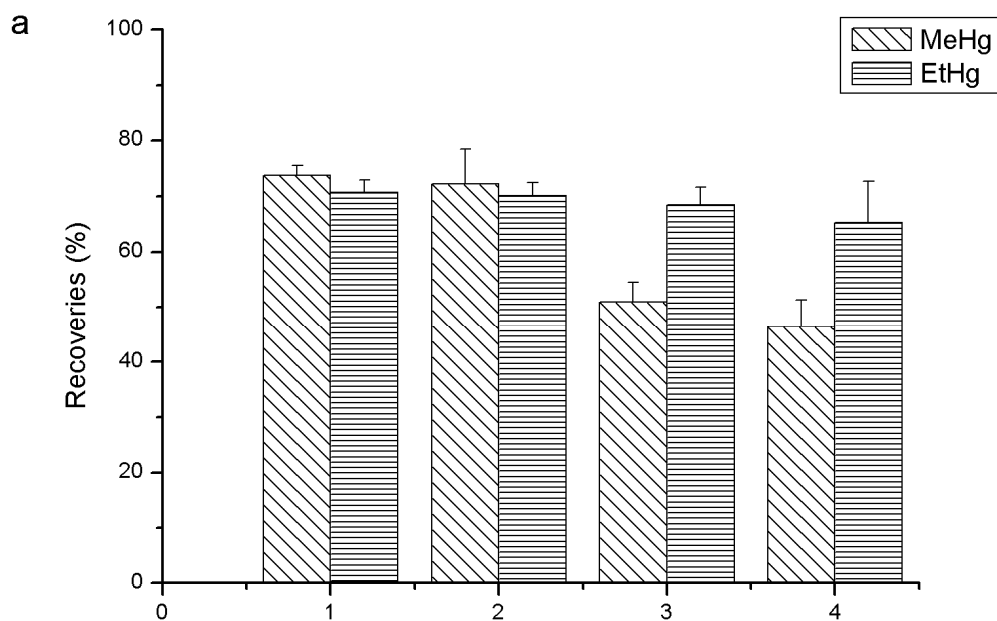

4

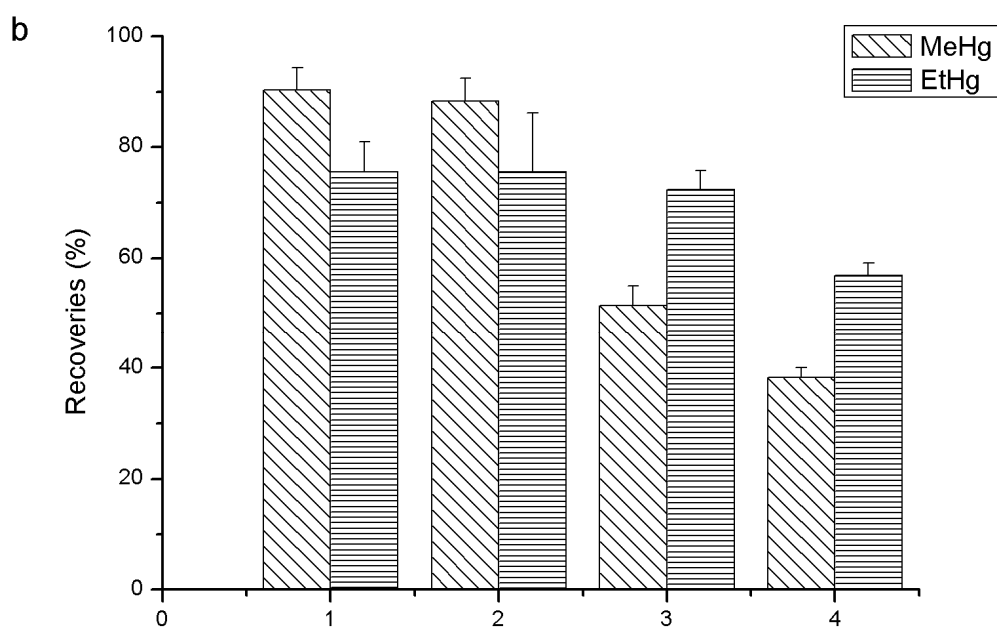

5



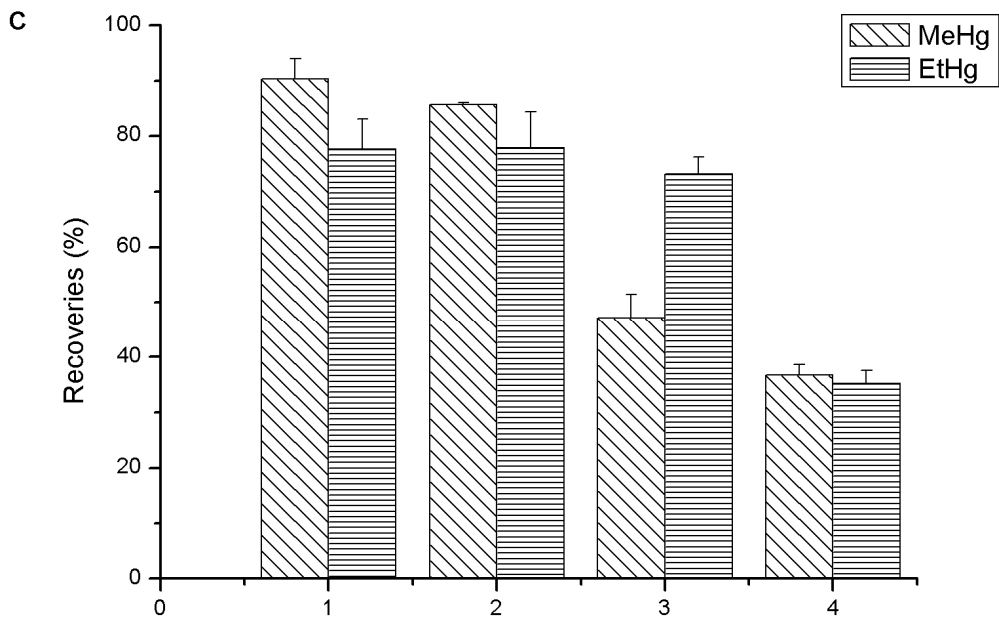

1

2

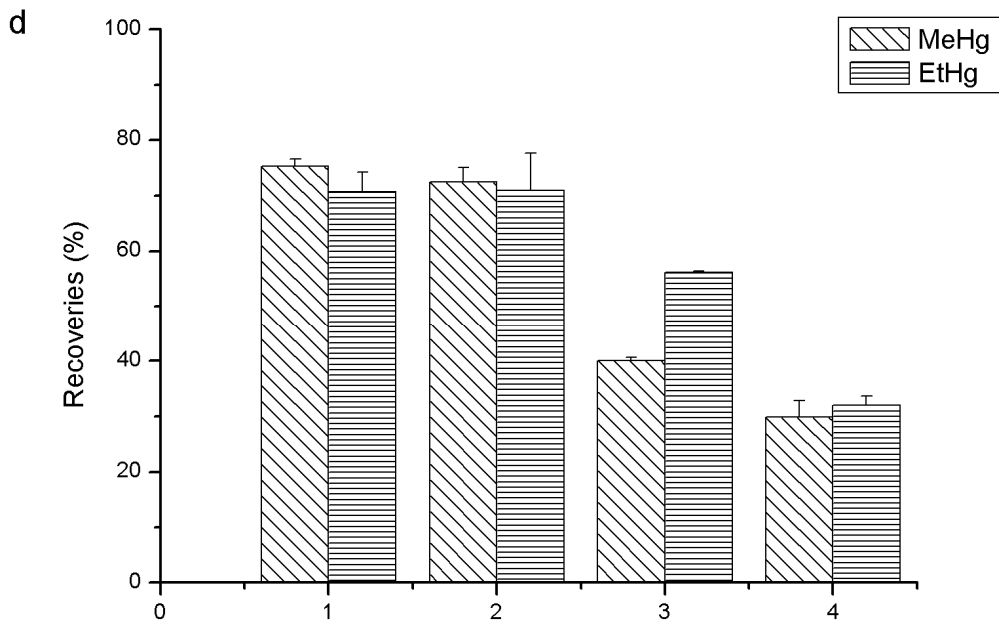

3

4
